# Supplementary material for: Chemical Composition Analysis, Cytotoxic, Antimicrobial and Antioxidant Activities of Physalis angulata L.: A Comparative Study of Leaves and Fruit
Source: MDPI journal article supplement (doi:10.3390/molecules27051480), 2022-02-22
Supplement: s1 [file s1]

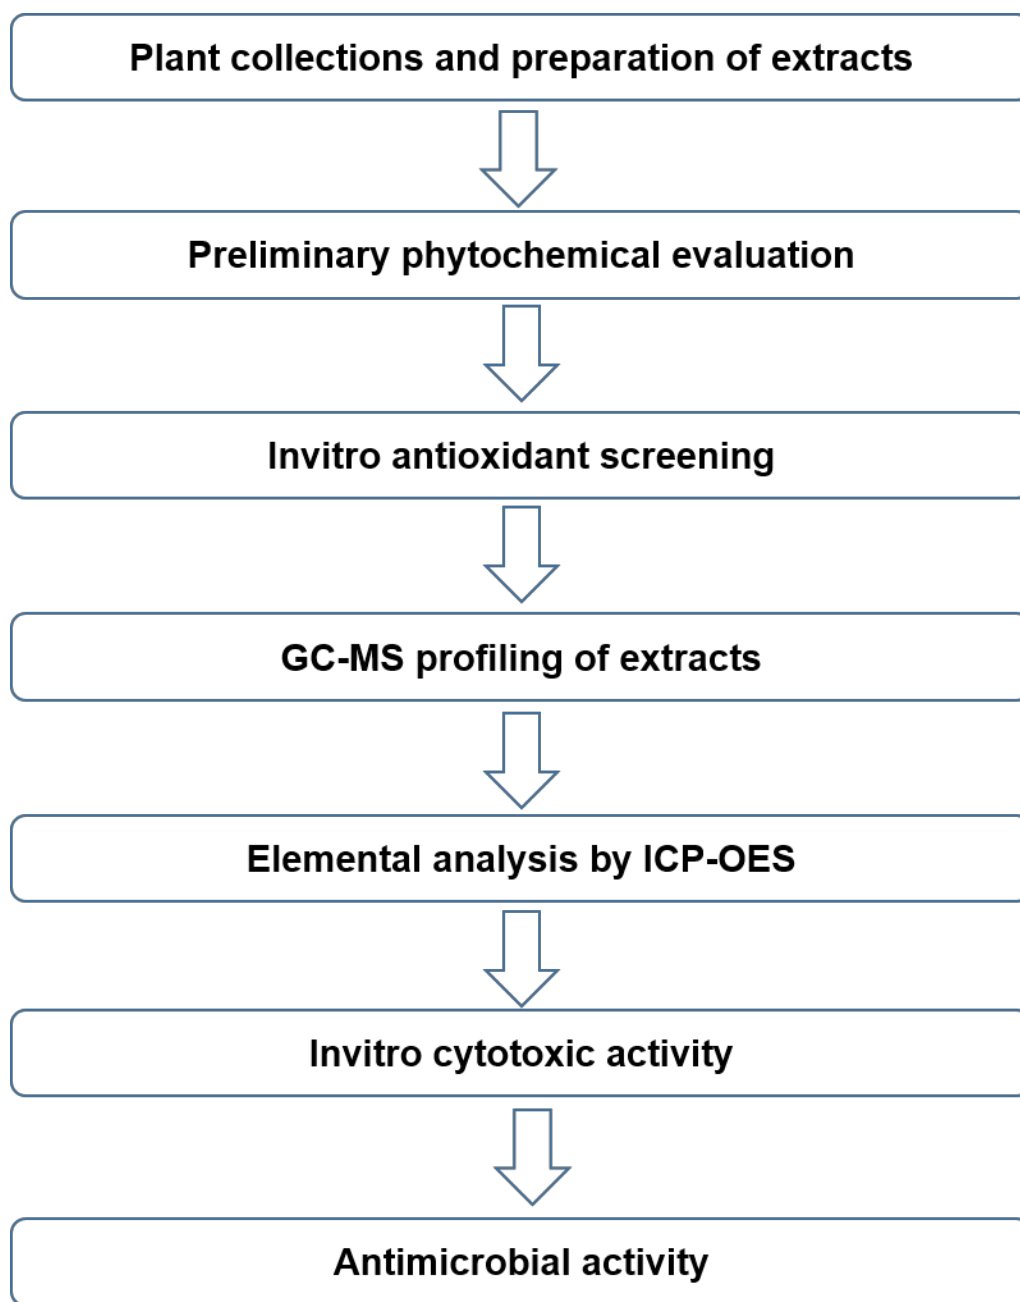

**Figure S1.** The transparent flowchart of the materials and methods section.

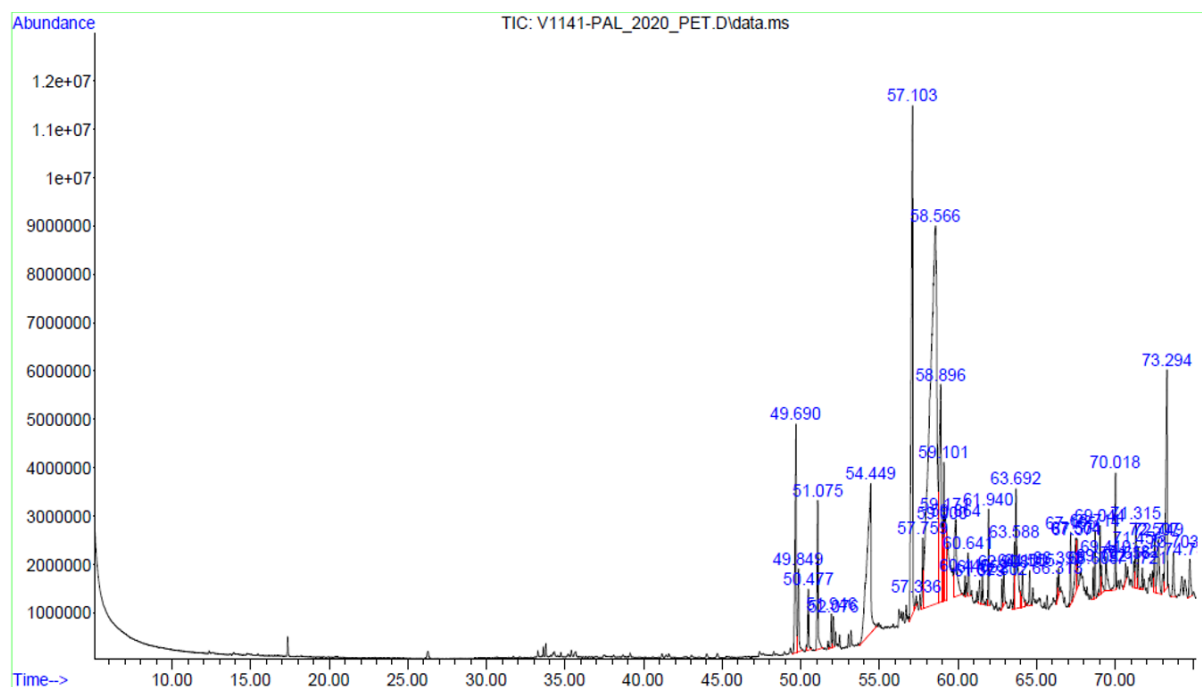

**Figure S2.** Representative full scan chromatographic profile of ethanolic extract (leaves) of *Physalis angulata*

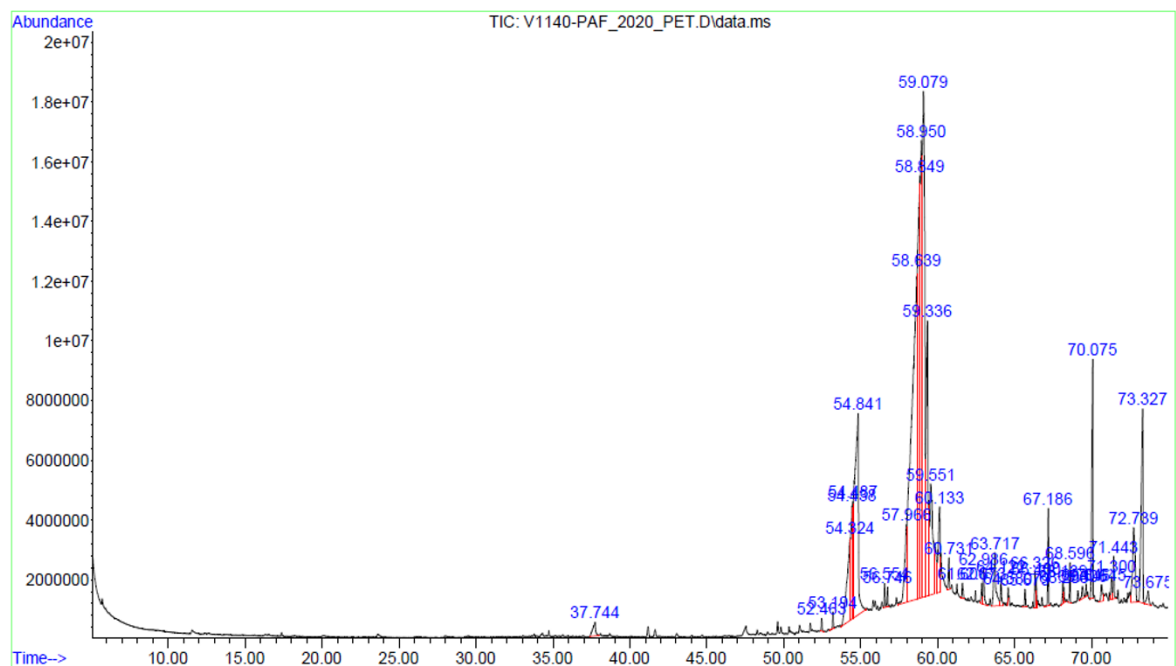

**Figure S3.** Representative full scan chromatographic profile of ethanolic extract (fruits) of *Physalis angulata*.

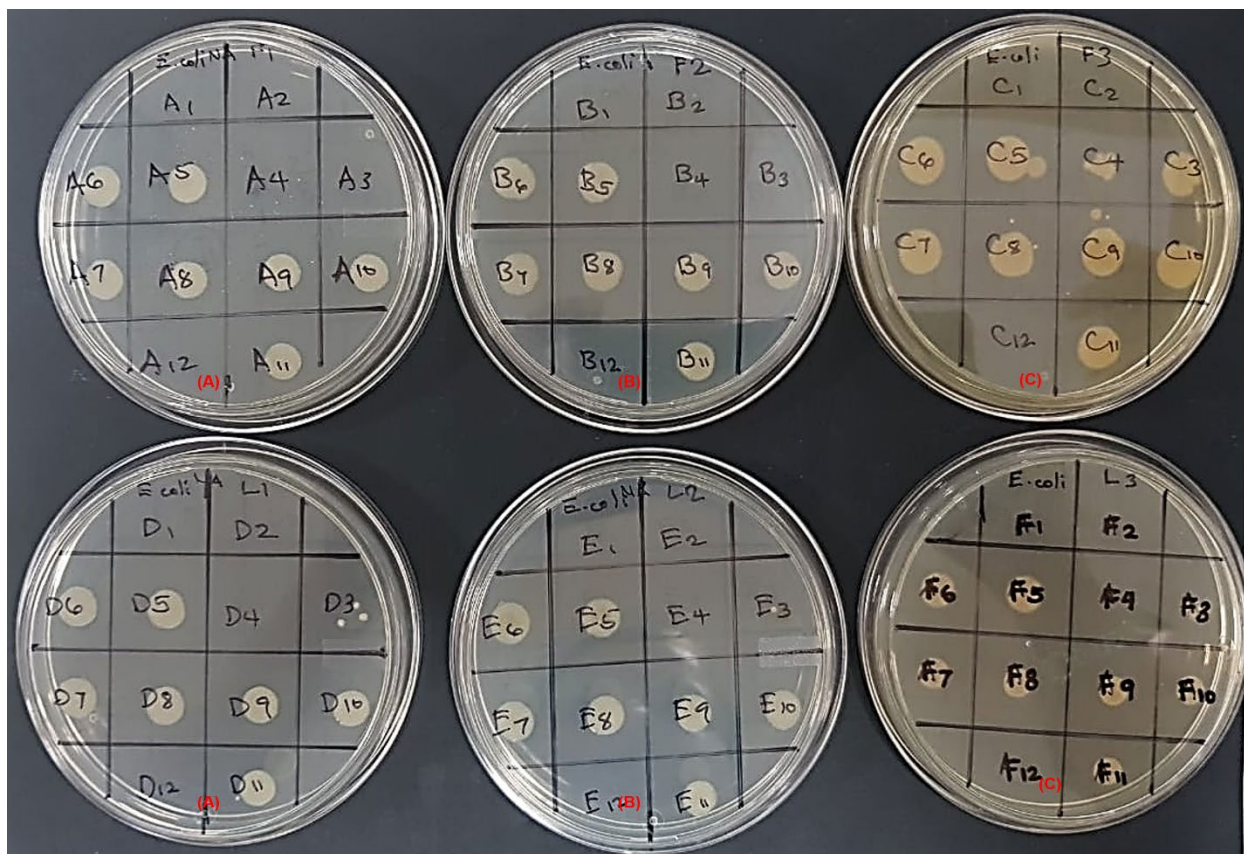

**Figure S4.** Antibacterial activity of *Physalis angulata* fruit extracts. Plate A: petroleum ether, Plate B: ethyl acetate, and Plate C: ethanol extracts.

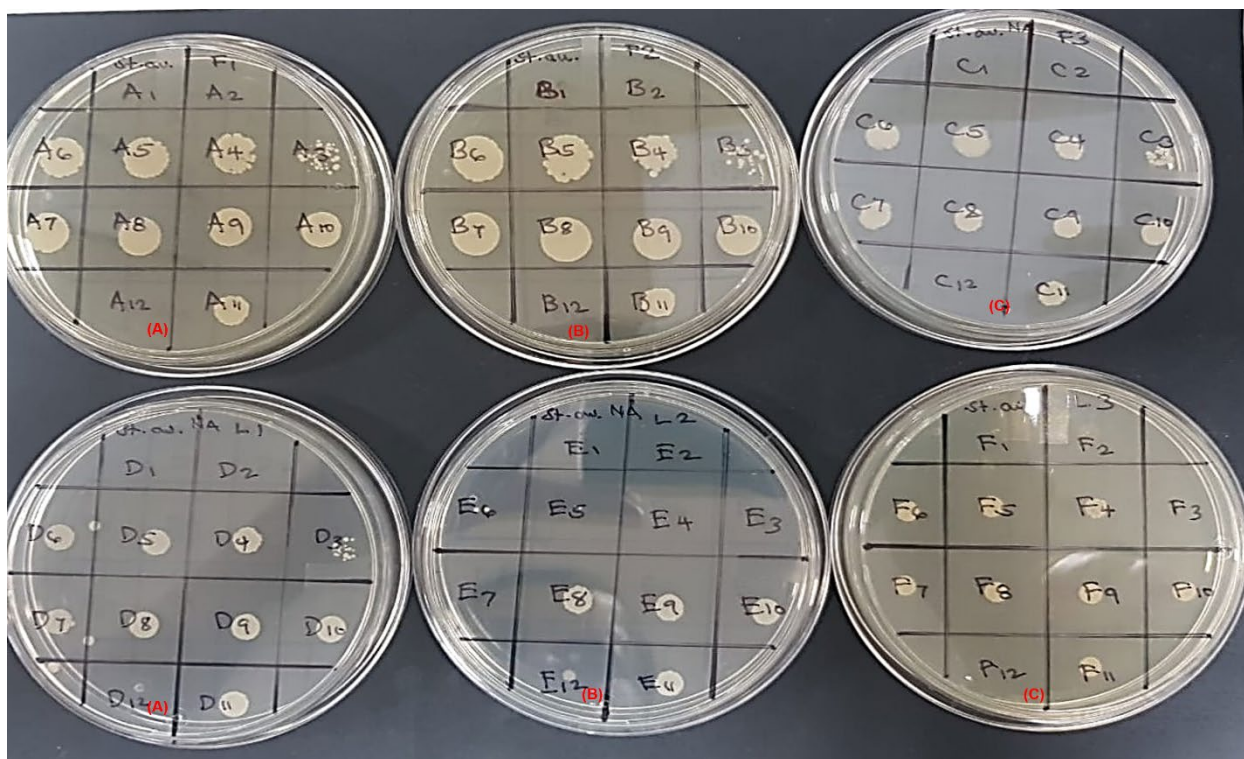

**Figure S5.** Antibacterial activity of *Physalis angulata* leaves extracts. Plate A: petroleum ether, Plate B: ethyl acetate, and Plate C: ethanol extracts
